# Supplementary material
Source: MDPI journal article supplement (https://www.mdpi.com/2571-6255/1/2/29)
Supplement: s1 [file s1]

Kelly, L.T.; Brotons, L.; Giljohann, K.M.; McCarthy, M.A.; Pausas, J.G.; Smith, A.L. Bridging the divide: integrating animal and plant paradigms to secure the future of biodiversity in fire-prone ecosystems. *Fire* **2018**

**Supplementary Material.** We reviewed the ten most recent papers on fire ecology published in each of five exemplar journals (*Biological Conservation*, *Ecology*, *Forest Ecology and Management*, *Global Ecology and Biogeography* and *International Journal of Wildland Fire*; n = 50 papers). On 11/06/2018 we used the keyword 'fire' to search for relevant articles, using the search engine provided by the publisher of each journal. Results were sorted by date and papers were included in the review if they investigated either animal or plant associations with fire. We excluded articles that did not present new data or that examined data on fires but not animals or plants. For each journal, we classified the ten most recent papers that met our criteria as either animal-based ('Animals'), plant-based ('Plants') or investigating both animals and plants ('Joint'). Studies were classified as joint if they assessed associations of both animals and plants with fire or explicitly incorporated both groups into experimental design.

| PaperID | Title                                                                                                                          | Journal                 | DOI                                                                                                     | Animals | Plants | Joint |
|---------|--------------------------------------------------------------------------------------------------------------------------------|-------------------------|---------------------------------------------------------------------------------------------------------|---------|--------|-------|
| 1       | Disentangling effects of fire, habitat, and climate on an endangered prairie specialist butterfly                              | Biological Conservation | <a href="https://doi.org/10.1016/j.biocon.2017.10.034">https://doi.org/10.1016/j.biocon.2017.10.034</a> | 1       | 1      | 1     |
| 2       | Aboriginal burning promotes fine-scale pyrodiversity and native predators in Australia's Western Desert                        | Biological Conservation | <a href="https://doi.org/10.1016/j.biocon.2018.01.008">https://doi.org/10.1016/j.biocon.2018.01.008</a> | 1       | 0      | 0     |
| 3       | Prescribed burning impacts avian diversity and disadvantages woodland specialist birds unless long-unburnt habitat is retained | Biological Conservation | <a href="https://doi.org/10.1016/j.biocon.2017.09.005">https://doi.org/10.1016/j.biocon.2017.09.005</a> | 1       | 0      | 0     |
| 4       | Fire-induced forest transition to derived savannas: Cascading effects on ant communities                                       | Biological Conservation | <a href="https://doi.org/10.1016/j.biocon.2017.08.020">https://doi.org/10.1016/j.biocon.2017.08.020</a> | 1       | 0      | 0     |
| 5       | Declines revisited: Long-term recovery and spatial population dynamics of tailed frog larvae after wildfire                    | Biological Conservation | <a href="https://doi.org/10.1016/j.biocon.2017.06.022">https://doi.org/10.1016/j.biocon.2017.06.022</a> | 1       | 0      | 0     |
| 6       | Mitigation for energy development fails to mimic natural disturbance for birds and mammals                                     | Biological Conservation | <a href="https://doi.org/10.1016/j.biocon.2017.05.023">https://doi.org/10.1016/j.biocon.2017.05.023</a> | 1       | 1      | 1     |
| 7       | Restoration treatments to control <i>Molinia arundinacea</i> and woody and alien species encroachment in <i>Calluna</i>        | Biological Conservation | <a href="https://doi.org/10.1016/j.biocon.2017.05.013">https://doi.org/10.1016/j.biocon.2017.05.013</a> | 0       | 1      | 0     |

Kelly, L.T.; Brotons, L.; Giljohann, K.M.; McCarthy, M.A.; Pausas, J.G.; Smith, A.L. Bridging the divide: integrating animal and plant paradigms to secure the future of biodiversity in fire-prone ecosystems. *Fire* **2018**

|    |                                                                                                                                        |                         |                                                                                                         |   |   |   |
|----|----------------------------------------------------------------------------------------------------------------------------------------|-------------------------|---------------------------------------------------------------------------------------------------------|---|---|---|
|    | vulgaris heathlands at the southern edge of their distribution                                                                         |                         |                                                                                                         |   |   |   |
| 8  | Bombs, fire and biodiversity: Vertebrate fauna occurrence in areas subject to military training                                        | Biological Conservation | <a href="https://doi.org/10.1016/j.biocon.2016.10.030">https://doi.org/10.1016/j.biocon.2016.10.030</a> | 1 | 1 | 1 |
| 9  | Contrasting effects of land use legacies on grassland restoration in burnt pine plantations                                            | Biological Conservation | <a href="https://doi.org/10.1016/j.biocon.2016.08.004">https://doi.org/10.1016/j.biocon.2016.08.004</a> | 0 | 1 | 0 |
| 10 | Are forest gullies refuges for birds when burnt? The value of topographical heterogeneity to avian diversity in a fire-prone landscape | Biological Conservation | <a href="https://doi.org/10.1016/j.biocon.2016.05.010">https://doi.org/10.1016/j.biocon.2016.05.010</a> | 1 | 0 | 0 |
| 11 | Fire disturbance disrupts an acacia ant-plant mutualism in favor of a subordinate ant species                                          | Ecology                 | <a href="https://doi.org/10.1002/ecy.1797">https://doi.org/10.1002/ecy.1797</a>                         | 1 | 1 | 1 |
| 12 | Pinus contorta invasions increase wildfire fuel loads and may create a positive feedback with fire                                     | Ecology                 | <a href="https://doi.org/10.1002/ecy.1673">https://doi.org/10.1002/ecy.1673</a>                         | 0 | 1 | 0 |
| 13 | Aridity, not fire, favors nitrogen-fixing plants across tropical savanna and forest biomes                                             | Ecology                 | <a href="https://doi.org/10.1002/ecy.1504">https://doi.org/10.1002/ecy.1504</a>                         | 0 | 1 | 0 |
| 14 | Biotic resistance and disturbance: rodent consumers regulate post-fire plant invasions and increase plant community diversity          | Ecology                 | <a href="https://doi.org/10.1002/ecy.1391">https://doi.org/10.1002/ecy.1391</a>                         | 1 | 1 | 1 |
| 15 | Fire ecology of C3 and C4 grasses depends on evolutionary history and frequency of burning but not photosynthetic type                 | Ecology                 | <a href="https://doi.org/10.1890/14-1495.1">https://doi.org/10.1890/14-1495.1</a>                       | 0 | 1 | 0 |
| 16 | Early-season fires in boreal black spruce forests produce pyrogenic carbon with low intrinsic recalcitrance                            | Ecology                 | <a href="https://doi.org/10.1890/14-1196.1">https://doi.org/10.1890/14-1196.1</a>                       | 0 | 1 | 0 |
| 17 | Bison foraging responds to fire frequency in nutritionally heterogeneous grassland                                                     | Ecology                 | <a href="https://doi.org/10.1890/14-2027.1">https://doi.org/10.1890/14-2027.1</a>                       | 1 | 1 | 1 |

Kelly, L.T.; Brotons, L.; Giljohann, K.M.; McCarthy, M.A.; Pausas, J.G.; Smith, A.L. Bridging the divide: integrating animal and plant paradigms to secure the future of biodiversity in fire-prone ecosystems. *Fire* **2018**

|    |                                                                                                                                                                                                    |                               |                                                                                                         |   |   |   |
|----|----------------------------------------------------------------------------------------------------------------------------------------------------------------------------------------------------|-------------------------------|---------------------------------------------------------------------------------------------------------|---|---|---|
| 18 | Fire alters ecosystem carbon and nutrients but not plant nutrient stoichiometry or composition in tropical savanna                                                                                 | Ecology                       | <a href="https://doi.org/10.1890/14-1158.1">https://doi.org/10.1890/14-1158.1</a>                       | 0 | 1 | 0 |
| 19 | A late-Quaternary perspective on atmospheric pCO <sub>2</sub> , climate, and fire as drivers of C <sub>4</sub> -grass abundance                                                                    | Ecology                       | <a href="https://doi.org/10.1890/14-0209.1">https://doi.org/10.1890/14-0209.1</a>                       | 0 | 1 | 0 |
| 20 | A fire-driven shift from forest to non-forest: evidence for alternative stable states?                                                                                                             | Ecology                       | <a href="https://doi.org/10.1890/12-1766.1">https://doi.org/10.1890/12-1766.1</a>                       | 0 | 1 | 0 |
| 21 | Disentangling the effects of crown scorch and competition release on the physiological and growth response of <i>Pinus halepensis</i> Mill. using d <sup>13</sup> C and d <sup>18</sup> O isotopes | Forest Ecology and Management | <a href="https://doi.org/10.1016/j.foreco.2018.04.056">https://doi.org/10.1016/j.foreco.2018.04.056</a> | 0 | 1 | 0 |
| 22 | Fire and forest recovery on seismic lines in sandy upland jack pine ( <i>Pinus banksiana</i> ) forests                                                                                             | Forest Ecology and Management | <a href="https://doi.org/10.1016/j.foreco.2018.01.027">https://doi.org/10.1016/j.foreco.2018.01.027</a> | 0 | 1 | 0 |
| 23 | Fuel mass and stand structure 13 years after logging of a severely burned ponderosa pine forest in northeastern Oregon, U.S.A                                                                      | Forest Ecology and Management | <a href="https://doi.org/10.1016/j.foreco.2018.04.047">https://doi.org/10.1016/j.foreco.2018.04.047</a> | 0 | 1 | 0 |
| 24 | Germination, survival, and early growth of three invasive plants in response to five forest management regimes common to US northeastern deciduous forests                                         | Forest Ecology and Management | <a href="https://doi.org/10.1016/j.foreco.2018.05.037">https://doi.org/10.1016/j.foreco.2018.05.037</a> | 0 | 1 | 0 |
| 25 | Long-term avian response to fire severity, repeated burning, and mechanical fuel reduction in upland hardwood forest                                                                               | Forest Ecology and Management | <a href="https://doi.org/10.1016/j.foreco.2018.05.014">https://doi.org/10.1016/j.foreco.2018.05.014</a> | 1 | 1 | 1 |
| 26 | Recent post-wildfire salvage logging benefits local and landscape floral and bee communities                                                                                                       | Forest Ecology and Management | <a href="https://doi.org/10.1016/j.foreco.2018.05.009">https://doi.org/10.1016/j.foreco.2018.05.009</a> | 1 | 1 | 1 |
| 27 | Substrate specific restoration                                                                                                                                                                     | Forest Ecology and Management | <a href="https://doi.org/10.1016/j.foreco.2018.05.019">https://doi.org/10.1016/j.foreco.2018.05.019</a> | 1 | 1 | 1 |

Kelly, L.T.; Brotons, L.; Giljohann, K.M.; McCarthy, M.A.; Pausas, J.G.; Smith, A.L. Bridging the divide: integrating animal and plant paradigms to secure the future of biodiversity in fire-prone ecosystems. *Fire* **2018**

|    |                                                                                                                                                              |                                 |                                                                                                                 |   |   |   |
|----|--------------------------------------------------------------------------------------------------------------------------------------------------------------|---------------------------------|-----------------------------------------------------------------------------------------------------------------|---|---|---|
|    | promotes saproxylic beetle diversity in boreal forest set-asides                                                                                             | Management                      |                                                                                                                 |   |   |   |
| 28 | The influence of fire history on soil nutrients and vegetation cover in mixed severity fire regime forests of the eastern Olympic Peninsula, Washington, USA | Forest Ecology and Management   | <a href="https://doi.org/10.1016/j.foreco.2018.03.037">https://doi.org/10.1016/j.foreco.2018.03.037</a>         | 0 | 1 | 0 |
| 29 | The role of fire history, land-use, and vegetation structure on the response of Mediterranean lizards to fire                                                | Forest Ecology and Management   | <a href="https://doi.org/10.1016/j.foreco.2018.03.029">https://doi.org/10.1016/j.foreco.2018.03.029</a>         | 1 | 0 | 0 |
| 30 | Structural diversity and dynamics of boreal old-growth forests case study in Eastern Canada                                                                  | Forest Ecology and Management   | <a href="https://doi.org/10.1016/j.foreco.2018.04.007">https://doi.org/10.1016/j.foreco.2018.04.007</a>         | 0 | 1 | 0 |
| 31 | Long-term potential for fires in estimates of the occurrence of savannas in the tropics                                                                      | Global Ecology and Biogeography | <a href="https://doi.org/10.1111/j.1466-8238.2007.00356.x">https://doi.org/10.1111/j.1466-8238.2007.00356.x</a> | 0 | 1 | 0 |
| 32 | Not only trees: Grasses determine African tropical biome distributions via water limitation and fire                                                         | Global Ecology and Biogeography | <a href="https://doi.org/10.1111/geb.12735">https://doi.org/10.1111/geb.12735</a>                               | 0 | 1 | 0 |
| 33 | Are strong fire-vegetation feedbacks needed to explain the spatial distribution of tropical tree cover?                                                      | Global Ecology and Biogeography | <a href="https://doi.org/10.1111/geb.12380">https://doi.org/10.1111/geb.12380</a>                               | 0 | 1 | 0 |
| 34 | Diversity and species composition of West African ungulate assemblages: effects of fire, climate and soil                                                    | Global Ecology and Biogeography | <a href="https://doi.org/10.1111/j.1466-8238.2008.00416.x">https://doi.org/10.1111/j.1466-8238.2008.00416.x</a> | 1 | 0 | 0 |
| 35 | Predicting the century-long post-fire responses of reptiles                                                                                                  | Global Ecology and Biogeography | <a href="https://doi.org/10.1111/j.1466-8238.2011.00747.x">https://doi.org/10.1111/j.1466-8238.2011.00747.x</a> | 1 | 0 | 0 |
| 36 | Scale matters: fire-vegetation feedbacks are needed to explain tropical tree cover at the local scale                                                        | Global Ecology and Biogeography | <a href="https://doi.org/10.1111/geb.12562">https://doi.org/10.1111/geb.12562</a>                               | 0 | 1 | 0 |
| 37 | Fire and plant diversity at the global scale                                                                                                                 | Global Ecology and Biogeography | <a href="https://doi.org/10.1111/geb.12596">https://doi.org/10.1111/geb.12596</a>                               | 0 | 1 | 0 |
| 38 | Woody cover in African savannas: the role of resources, fire and herbivory                                                                                   | Global Ecology and Biogeography | <a href="https://doi.org/10.1111/j.1466-8238.2007.00360.x">https://doi.org/10.1111/j.1466-8238.2007.00360.x</a> | 1 | 1 | 1 |
| 39 | Fire persistence traits of plants along a                                                                                                                    | Global Ecology and              | <a href="https://doi.org/10.1111/j.1466-8238.2006.00283.x">https://doi.org/10.1111/j.1466-8238.2006.00283.x</a> | 0 | 1 | 0 |

Kelly, L.T.; Brotons, L.; Giljohann, K.M.; McCarthy, M.A.; Pausas, J.G.; Smith, A.L. Bridging the divide: integrating animal and plant paradigms to secure the future of biodiversity in fire-prone ecosystems. *Fire* **2018**

|    |                                                                                                                                                         |                                        |                                                                                                                 |   |   |   |
|----|---------------------------------------------------------------------------------------------------------------------------------------------------------|----------------------------------------|-----------------------------------------------------------------------------------------------------------------|---|---|---|
|    | productivity and disturbance gradient in mediterranean shrublands of south-east Australia                                                               | Biogeography                           |                                                                                                                 |   |   |   |
| 40 | Relationships among fire frequency, rainfall and vegetation patterns in the wet-dry tropics of northern Australia: an analysis based on NOAA-AVHRR data | Global Ecology and Biogeography        | <a href="https://doi.org/10.1111/j.1466-822x.2005.00174.x">https://doi.org/10.1111/j.1466-822x.2005.00174.x</a> | 0 | 1 | 0 |
| 41 | Importance of internal refuges and the external unburnt area in the recovery of rodent populations after wildfire                                       | International Journal of Wildland Fire | <a href="https://doi.org/10.1071/WF17102">https://doi.org/10.1071/WF17102</a>                                   | 1 | 0 | 0 |
| 42 | Post-fire surface fuel dynamics in California forests across three burn severity classes                                                                | International Journal of Wildland Fire | <a href="https://doi.org/10.1071/WF17148">https://doi.org/10.1071/WF17148</a>                                   | 0 | 1 | 0 |
| 43 | Tundra avian community composition during recovery from the Anaktuvuk River Fire                                                                        | International Journal of Wildland Fire | <a href="https://doi.org/10.1071/WF17159">https://doi.org/10.1071/WF17159</a>                                   | 1 | 0 | 0 |
| 44 | Short-term stem mortality of 10 deciduous broadleaved species following prescribed burning in upland forests of the Southern US                         | International Journal of Wildland Fire | <a href="https://doi.org/10.1071/WF17058">https://doi.org/10.1071/WF17058</a>                                   | 0 | 1 | 0 |
| 45 | Reproductive success of wind, generalist, and specialist pollinated plant species following wildfire in desert landscapes                               | International Journal of Wildland Fire | <a href="https://doi.org/10.1071/WF16222">https://doi.org/10.1071/WF16222</a>                                   | 0 | 1 | 0 |
| 46 | Relationships among burn severity, forest canopy structure and bat activity from spring burns in oak-hickory forests                                    | International Journal of Wildland Fire | <a href="https://doi.org/10.1071/WF16159">https://doi.org/10.1071/WF16159</a>                                   | 1 | 1 | 1 |
| 47 | Messmate stringybark: bark ignitability and burning sustainability in relation to fragment dimensions, hazard score and time since fire                 | International Journal of Wildland Fire | <a href="https://doi.org/10.1071/WF16146">https://doi.org/10.1071/WF16146</a>                                   | 0 | 1 | 0 |
| 48 | Inability of fire to control vegetation dynamics in low-productivity mulga                                                                              | International Journal of Wildland Fire | <a href="https://doi.org/10.1071/WF17011">https://doi.org/10.1071/WF17011</a>                                   | 0 | 1 | 0 |

Kelly, L.T.; Brotons, L.; Giljohann, K.M.; McCarthy, M.A.; Pausas, J.G.; Smith, A.L. Bridging the divide: integrating animal and plant paradigms to secure the future of biodiversity in fire-prone ecosystems. *Fire* **2018**

|                                            |                                                                                                                                                                   |                                        |                                                                               |            |            |            |
|--------------------------------------------|-------------------------------------------------------------------------------------------------------------------------------------------------------------------|----------------------------------------|-------------------------------------------------------------------------------|------------|------------|------------|
| 49                                         | (Acacia aneura)-dominated communities of eastern Australia<br>Prescribed fire as a tool to regenerate live and dead serotinous jack pine (Pinus banksiana) stands | International Journal of Wildland Fire | <a href="https://doi.org/10.1071/WF17046">https://doi.org/10.1071/WF17046</a> | 0          | 1          | 0          |
| 50                                         | High post-fire mortality of resprouting woody plants in Tasmanian Mediterranean-type vegetation                                                                   | International Journal of Wildland Fire | <a href="https://doi.org/10.1071/WF16211">https://doi.org/10.1071/WF16211</a> | 0          | 1          | 0          |
| <b>NUMBER OF PAPERS IN CATEGORY (n=50)</b> |                                                                                                                                                                   |                                        |                                                                               | <b>21</b>  | <b>40</b>  | <b>11</b>  |
| <b>PERCENTAGE OF PAPERS IN CATEGORY</b>    |                                                                                                                                                                   |                                        |                                                                               | <b>42%</b> | <b>80%</b> | <b>22%</b> |
